# Supplementary material for: Multiplexed single-cell RNA-seq via transient barcoding for simultaneous expression profiling of various drug perturbations
Source: PubMed Central journal article supplement — Sci Adv. 2019 May 15;5(5):eaav2249. doi: 10.1126/sciadv.aav2249 (PMC6520024; doi:10.1126/sciadv.aav2249), 2019-05-15
Supplement: aav2249_SM.pdf [file aav2249_SM.pdf]

## Supplementary Materials for

### **Multiplexed single-cell RNA-seq via transient barcoding for simultaneous expression profiling of various drug perturbations**

Dongju Shin, Wookjae Lee, Ji Hyun Lee\*, Duhee Bang\*

\*Corresponding author. Email: [duheebang@yonsei.ac.kr](mailto:duheebang@yonsei.ac.kr) (D.B.); [hyunihyuni@khu.ac.kr](mailto:hyunihyuni@khu.ac.kr) (J.H.L.)

Published 15 May 2019, *Sci. Adv.* **5**, eaav2249 (2019)

DOI: [10.1126/sciadv.aav2249](https://doi.org/10.1126/sciadv.aav2249)

#### **The PDF file includes:**

- Fig. S1. Schematic figure of transient transfection using SBO.
- Fig. S2. Additional data for the species-mixing experiment.
- Fig. S3. SBO barcoding in heterogeneous cell samples and the effect of transient transfection.
- Fig. S4. Correlation heatmap of average gene expression across the drugs.
- Fig. S5. Volcano plots showing DEGs for each drug.
- Fig. S6. Cell cycle analysis and *t*-SNE at a single-cell resolution.
- Fig. S7. Expression heatmap for A375 drug screening experiment.
- Fig. S8. Comparison between previous methods and our method.
- Fig. S9. Cell numbers and sequencing depth for each experiment.

#### **Other Supplementary Material for this manuscript includes the following:**

(available at [advances.sciencemag.org/cgi/content/full/5/5/eaav2249/DC1](https://advances.sciencemag.org/cgi/content/full/5/5/eaav2249/DC1))

Table S1 (Microsoft Excel format). Oligos and drugs used in the drug screening experiment.

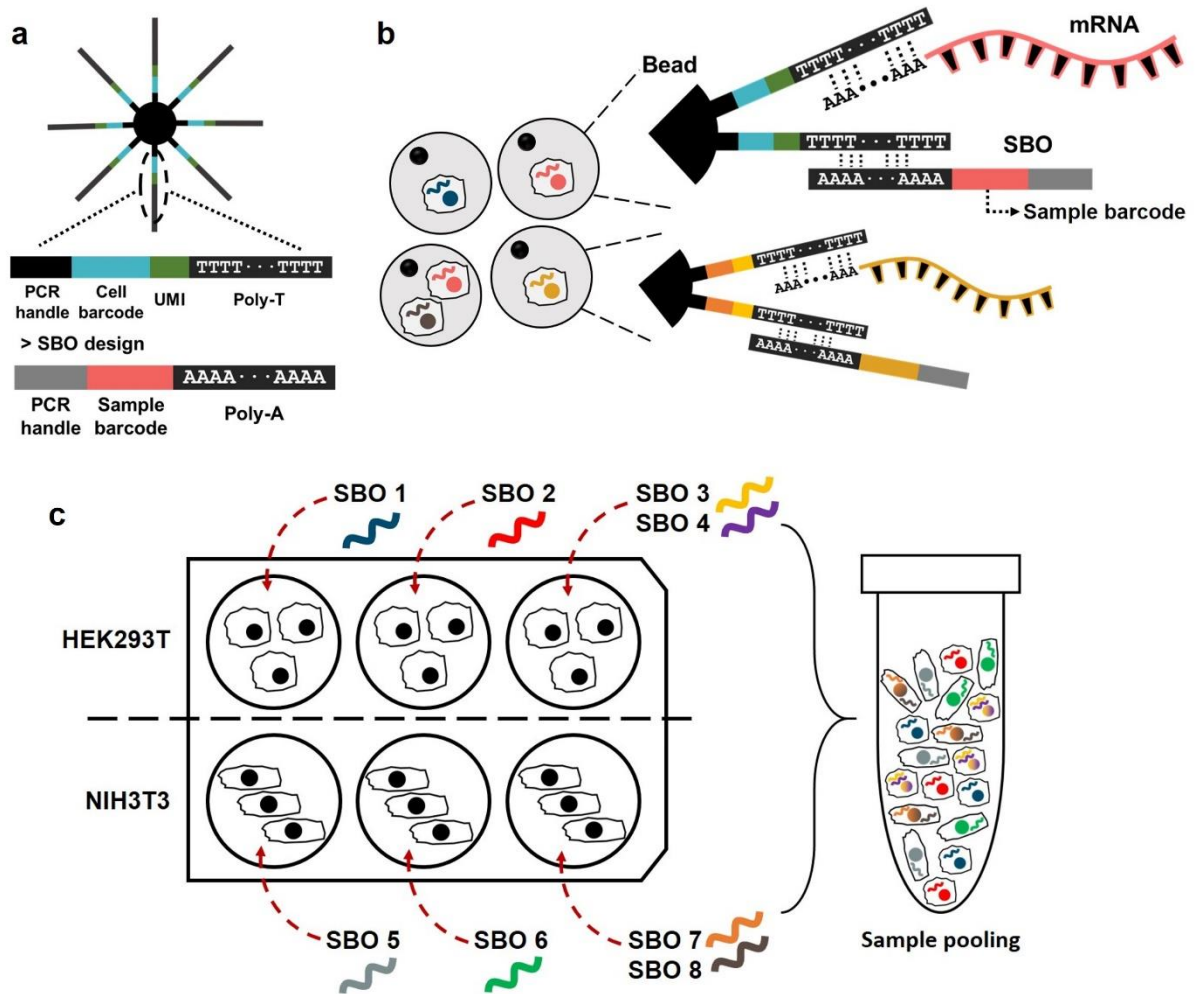

**Fig. S1. Schematic figure of transient transfection using SBO.** (a) Structure of Drop-Seq beads (top) and SBO (bottom). Drop-Seq beads contain the PCR handle (25 mer), cell barcode (12 mer), UMI (8 mer), and poly-T (30 mer). SBO contains the PCR handle (22 mer), sample barcode (8 mer), and poly-A (30 mer). (b) SBO and mRNA capture within droplets. After cell lysis, released mRNA and SBO are simultaneously captured by Drop-Seq beads by poly-A tail hybridization to poly-T sequence of beads. (c) Scheme of 6-plex human-mouse species-mixing experiment. Six cell samples (3 HEK293T samples and 3 NIH3T3 samples) are barcoded before sample pooling. Two samples of HEK293T and two samples of NIH3T3 are transfected with a single SBO. One sample each of HEK293T and NIH3T3 cells is transfected with a combination of two SBOs.

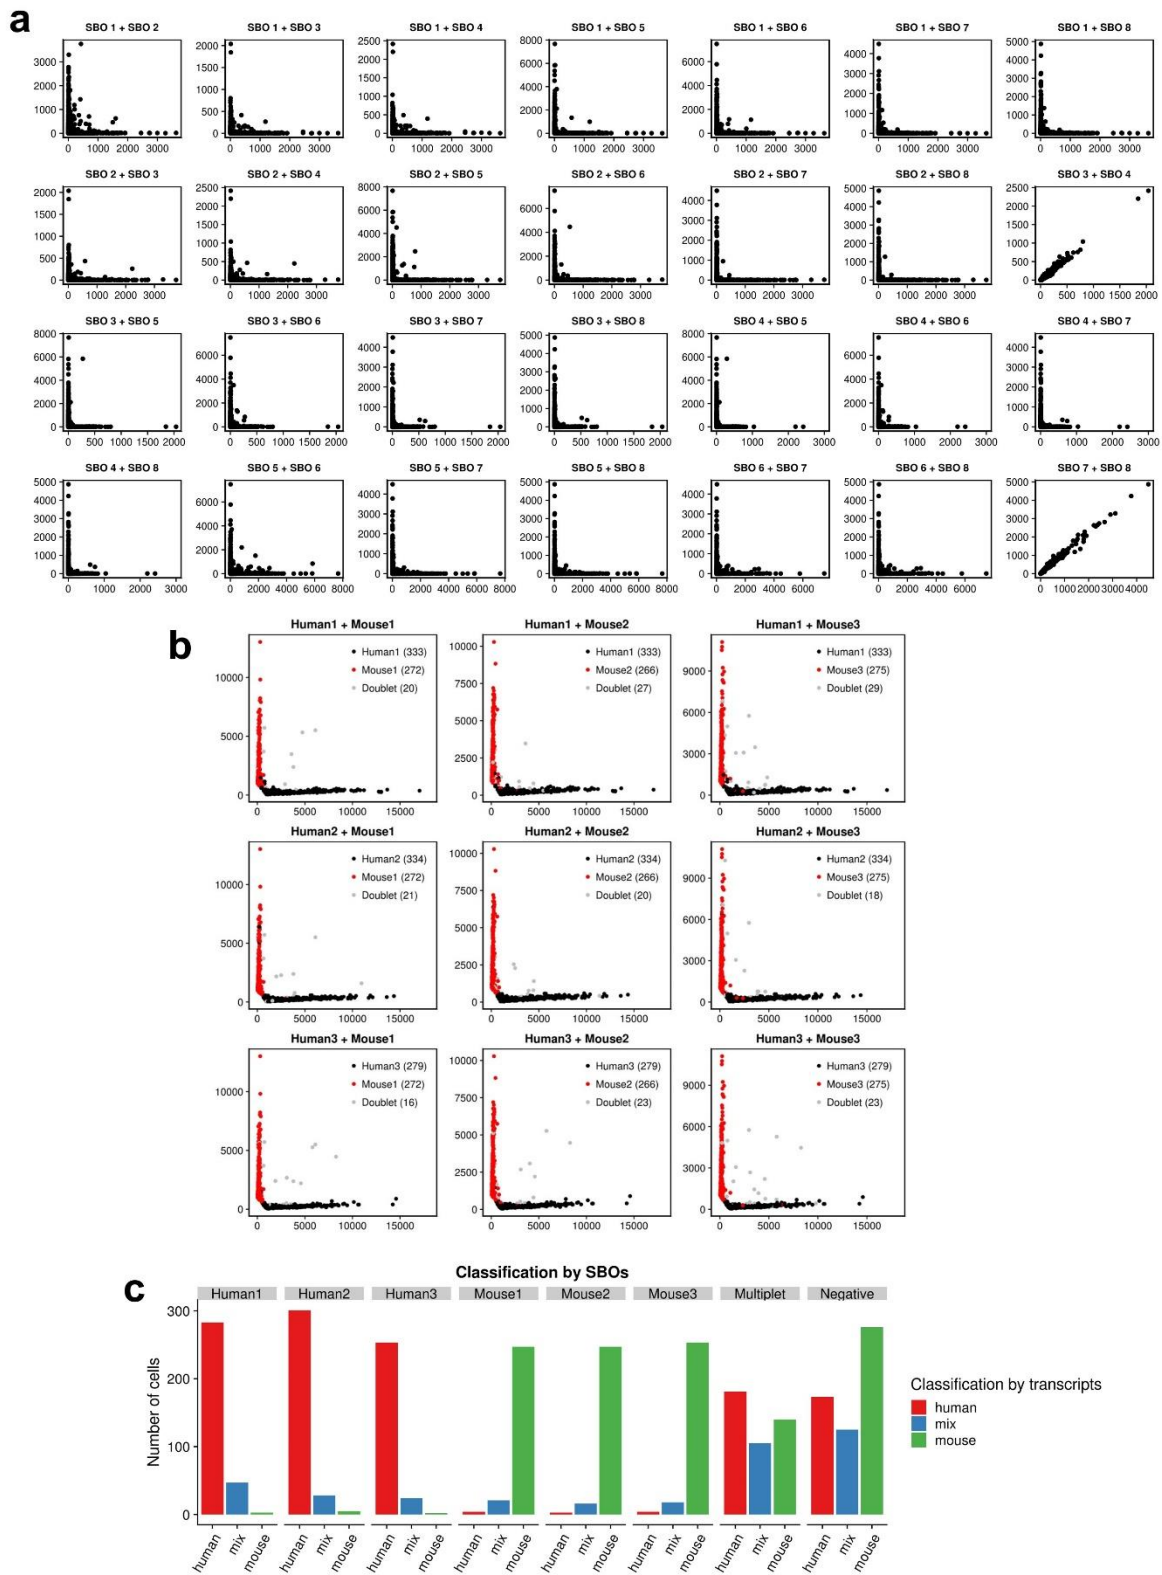

**Fig. S2. Additional data for the species-mixing experiment. (a)** Scatter plots of raw counts between two SBOs. Scatter plots of all possible combinations of two SBOs are shown. The x-axis denotes the former part of the subtitle. The y-axis denotes the latter part of the subtitle. Note that SBOs in samples (3+4 and 7+8) show a strong correlation in their counts, while the other combinations of SBOs show an exclusive relationship. **(b)** Species-mixing plot labeled by SBO classification. Cells are labeled according to their SBO classification. The x-axis denotes the number of human transcripts and the y-

axis denotes the number of mouse transcripts. Black dots indicate SBO-classified human samples, red dots indicate SBO-classified mouse samples, and grey dots indicate SBO-classified doublets that are positive for both human and mouse SBOs. (c) Bar plot showing the cell numbers of transcript-classified species within SBO-classified species.

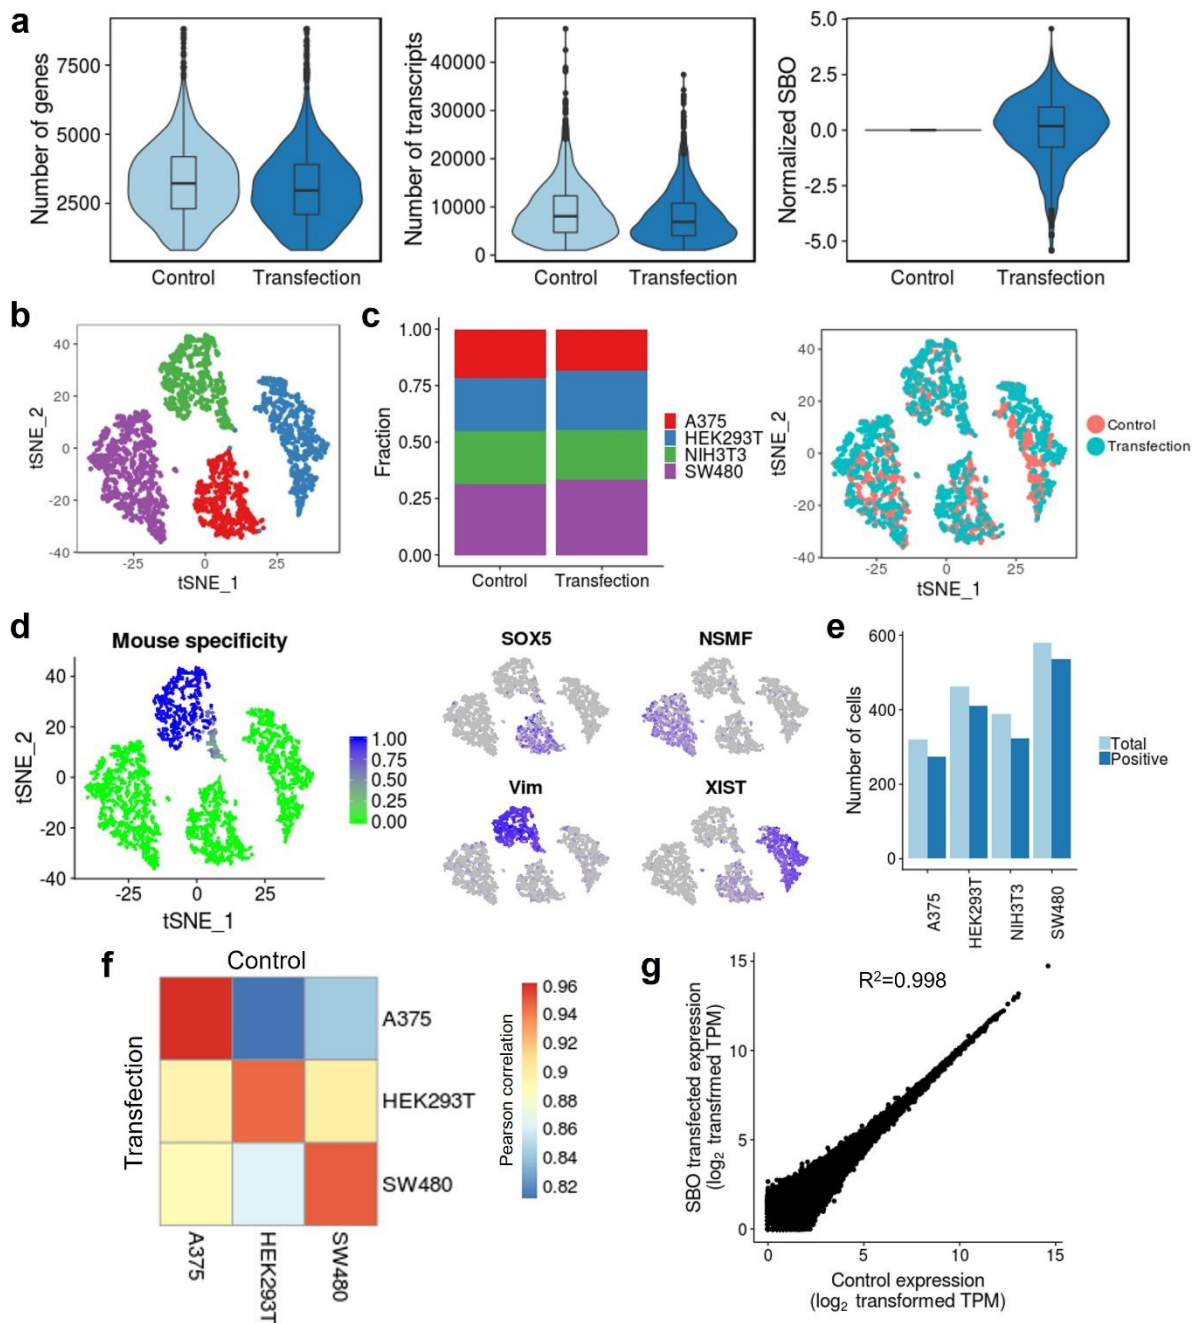

**Fig. S3. SBO barcoding in heterogeneous cell samples and the effect of transient transfection.**

Heterogeneous samples derived from A375, HEK293T, NIH3T3, and SW480 cell lines were barcoded by transient transfection and compared against non-transfected (control) samples. Cell lines were mixed before barcoding. **(a)** Distribution of genes, transcripts, and SBOs in both control and transfection samples. **(b)** tSNE visualization of single-cells colored by cluster identity. Each cluster was annotated to the cell line by cell line-specific markers. **(c)** Cluster occupancy of each sample. Control and transfection samples successfully clustered together without bias. **(d)** Expression of cell line-specific markers and species specificity (for the NIH3T3 mouse cell line), indicating successful cell line annotation. **(e)** Transfection efficiency of all cell lines was 80 - 90%. The number of cells positive for the SBO barcode and the total number of cells in each sample are shown. **(f)** Gene expression correlation of human clusters in control and transfected samples. The scale bar indicates

the Pearson correlation coefficient. (g) Gene expression correlation of transfected and control samples verified in bulk RNA-seq. Bulk RNA-seq was performed using K562 cell line.

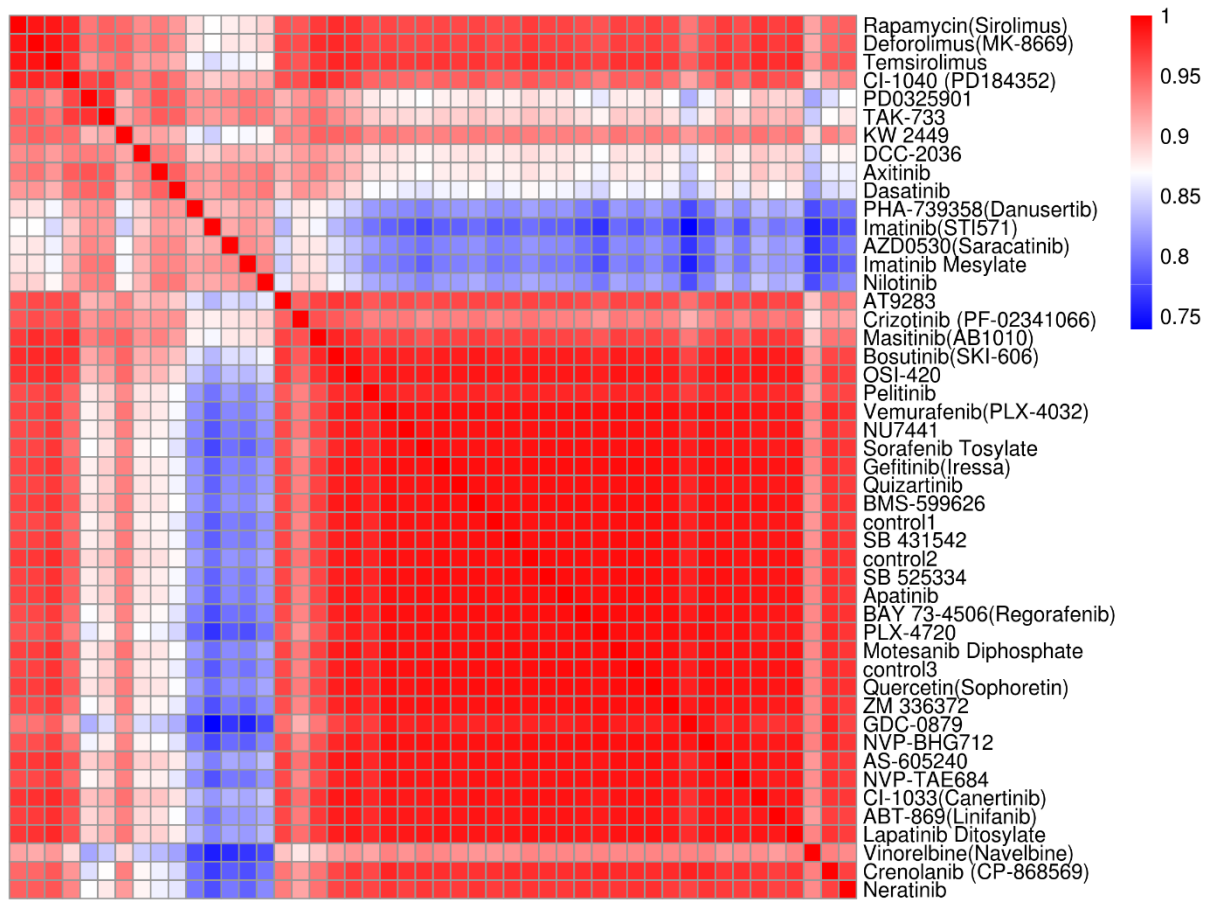

**Fig. S4. Correlation heatmap of average gene expression across the drugs.** Raw expressions of single-cells with each drug were averaged using genes used in Fig. 2c. Pearson correlation coefficients across 48 samples are calculated and expressed as a heatmap. Note that drugs that induced no response are highly correlated and response-inducing drugs correlate with their protein targets.

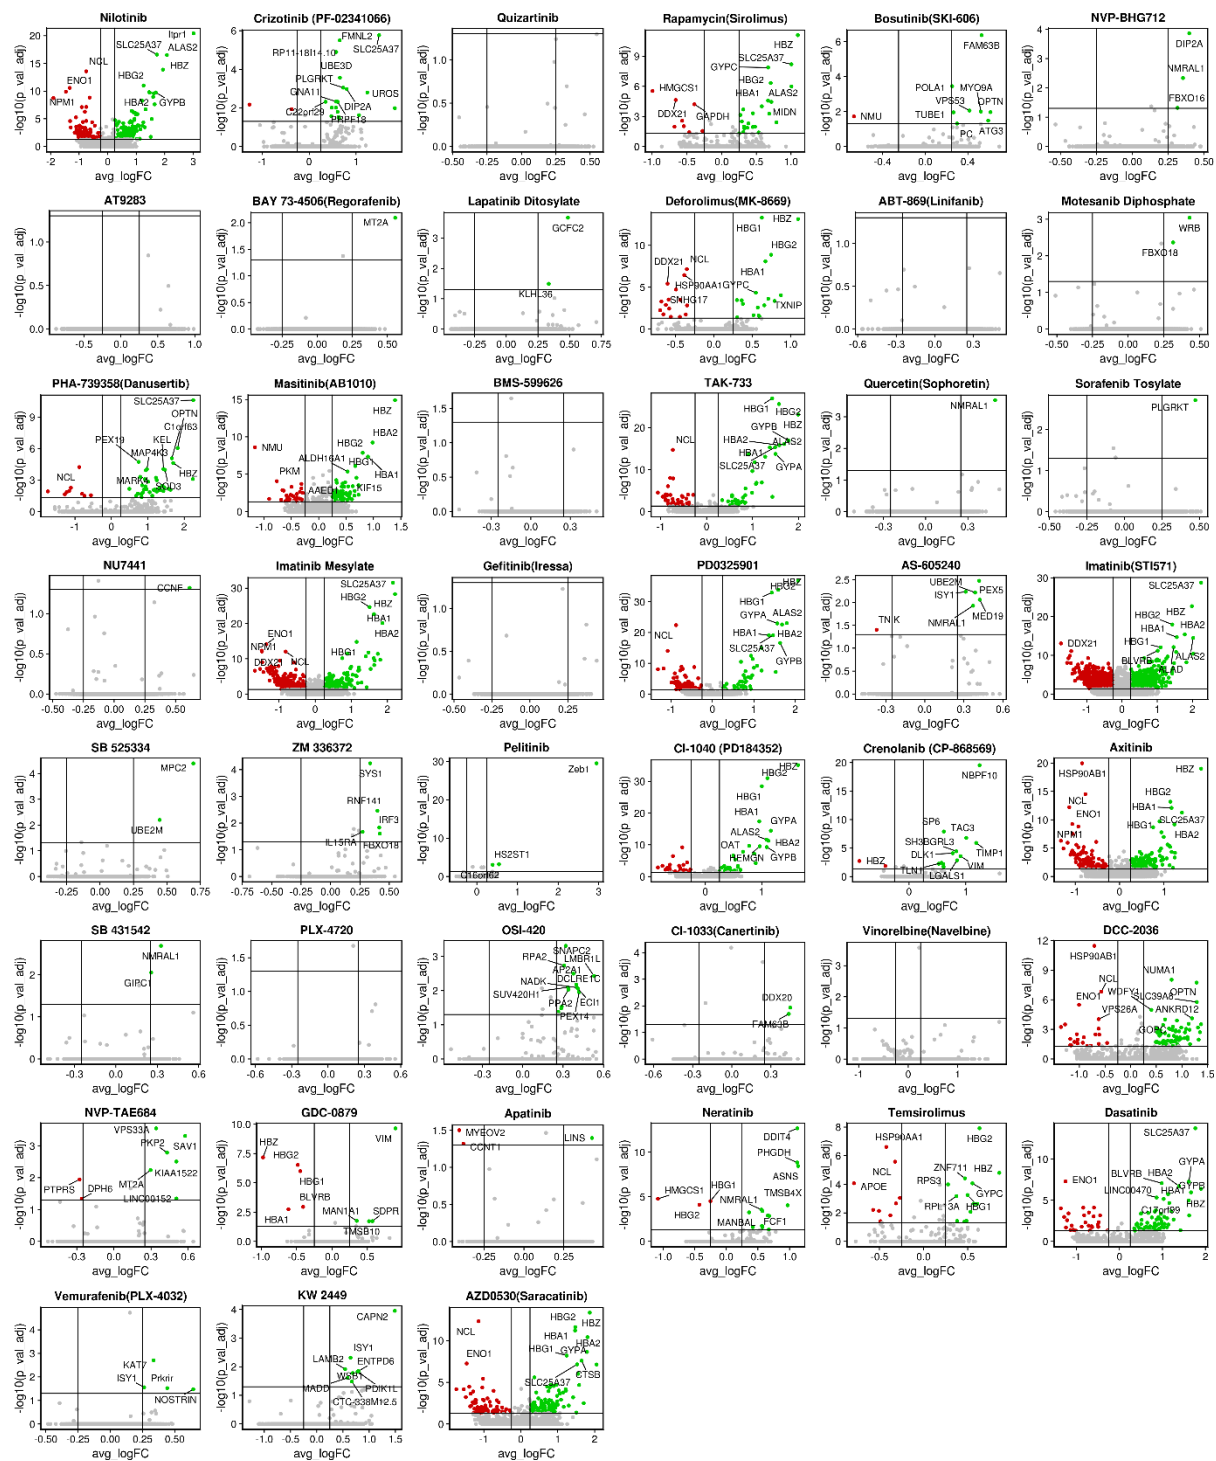

**Fig. S5. Volcano plots showing DEGs for each drug.** Volcano plots of 45 drugs showing differentially expressed genes. Genes that have a p-value smaller than 0.05 and an absolute value of log (fold change) larger than 0.25 are considered significant. Up-regulated genes are colored in green, down-regulated genes are colored in red. Insignificant genes are colored in grey. Ten genes with the lowest p-value are labeled.



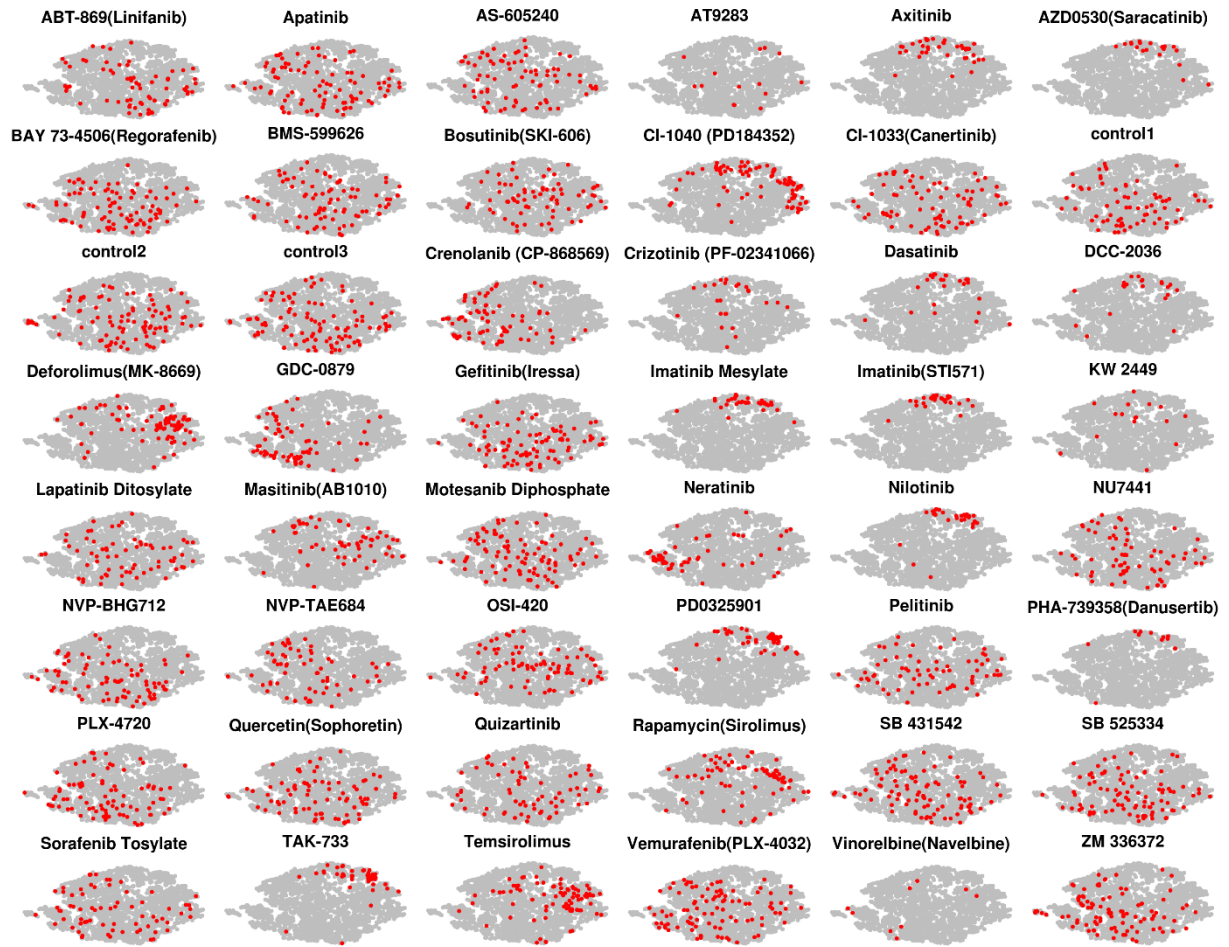

**Fig. S6. Cell cycle analysis and *t*-SNE at a single-cell resolution.** tSNE plots showing the distributions of samples in the plot.

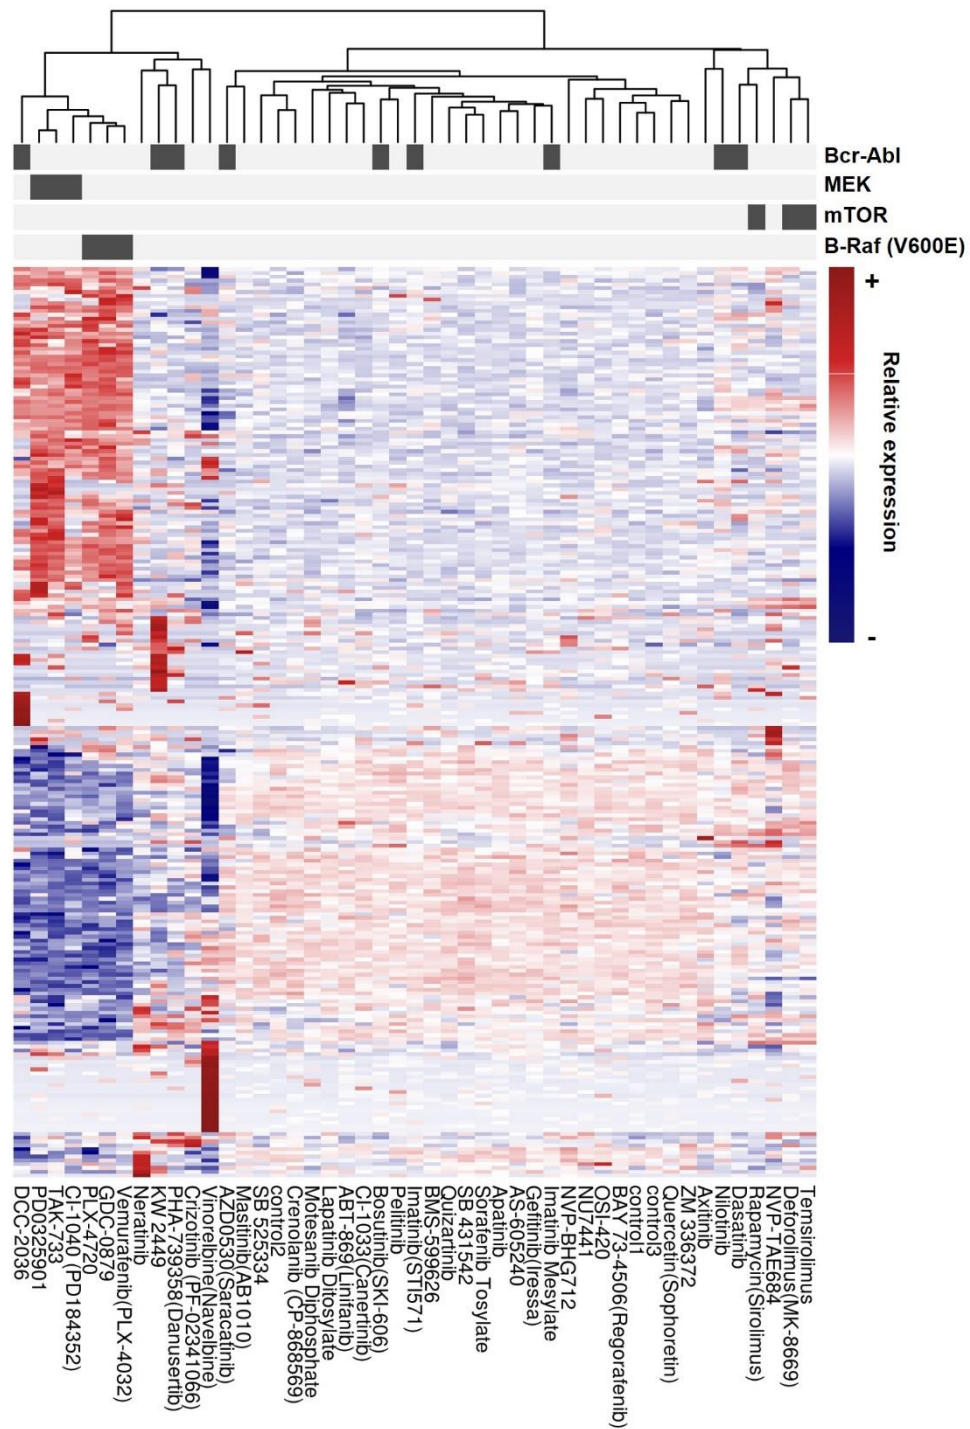

**Fig. S7. Expression heatmap for A375 drug screening experiment.** Hierarchical clustered heatmap of averaged gene expression profiles for 48-plex drug treatment experiments in A375 cells. Each column represents averaged data in a drug and each row represents a gene. Differentially expressed genes were used in this heatmap. The scale bar of relative expression is on the right side. The ability of the drugs to inhibit kinase proteins is shown as binary colors (dark grey indicating positive) at the top.

|                                         | <b>Previous scRNA-seq</b>           | <b>Demuxlet<sup>†</sup></b>                                             | <b>Cell hashing<sup>‡</sup></b>             | <b>Our method</b>                  |
|-----------------------------------------|-------------------------------------|-------------------------------------------------------------------------|---------------------------------------------|------------------------------------|
| <b>scRNA-seq method</b>                 | Drop-seq, inDrop, 10× Chromium, etc | 10× Chromium                                                            | 10× Chromium                                | Drop-seq                           |
| <b>Sample multiplexing</b>              | Unable                              | Able                                                                    | Able                                        | Able                               |
| <b>Multiplexing method</b>              | -                                   | Computational algorithm                                                 | Additional experimental method              | Additional experimental method     |
| <b>Need for multiplexing</b>            | -                                   | Information about single-nucleotide polymorphisms (SNPs) of individuals | Antibody-Oligo conjugation, Surface markers | Short barcoding oligo transfection |
| <b>Sample barcode</b>                   | -                                   | Endogenous SNPs                                                         | Exogenous synthetic barcode                 | Exogenous synthetic barcode        |
| <b>Available sample types</b>           | Any sample                          | Samples with distinct genetic backgrounds                               | Samples with known surface markers          | Any sample                         |
| <b>Cell over-loading</b>                | Unable                              | Able                                                                    | Able                                        | Able                               |
| <b>Multiple sample preparation cost</b> | High                                | Low                                                                     | Low                                         | Low                                |
| <b>Batch effect</b>                     | Sample specific                     | Minimized                                                               | Minimized                                   | Minimized                          |

**Fig. S8. Comparison between previous methods and our method.**

| <b>Experiment</b>       | <b>Species mixing</b>  | <b>Time-course</b>      | <b>Drug screening (K562)</b> |
|-------------------------|------------------------|-------------------------|------------------------------|
| Singlet                 | 1,787                  | 428                     | 3,091                        |
| Multiplet               | 388                    | 52                      | 487                          |
| Negative                | 584                    | 90                      | 1,322                        |
| Total                   | 2,759                  | 570                     | 4,900                        |
| Sequencing Depth (cDNA) | ~30,000 reads per cell | ~130,000 reads per cell | ~50,000 reads per cell       |
| Sequencing Depth (SBO)  | ~20,000 reads per cell | ~5,000 reads per cell   | ~5,000 reads per cell        |

**Fig. S9. Cell numbers and sequencing depth for each experiment.**
